# Supplementary material for: Estimated Glomerular Filtration Rate and the Risk of Major Vascular Events and All-Cause Mortality: A Meta-Analysis
Source: PLOS journal article supplement (doi:10.1371/journal.pone.0025920), 2011-10-19

**FIGURE S1: COMPARISON OF ACTUAL VS ESTIMATED MEAN eGFR LEVELS**

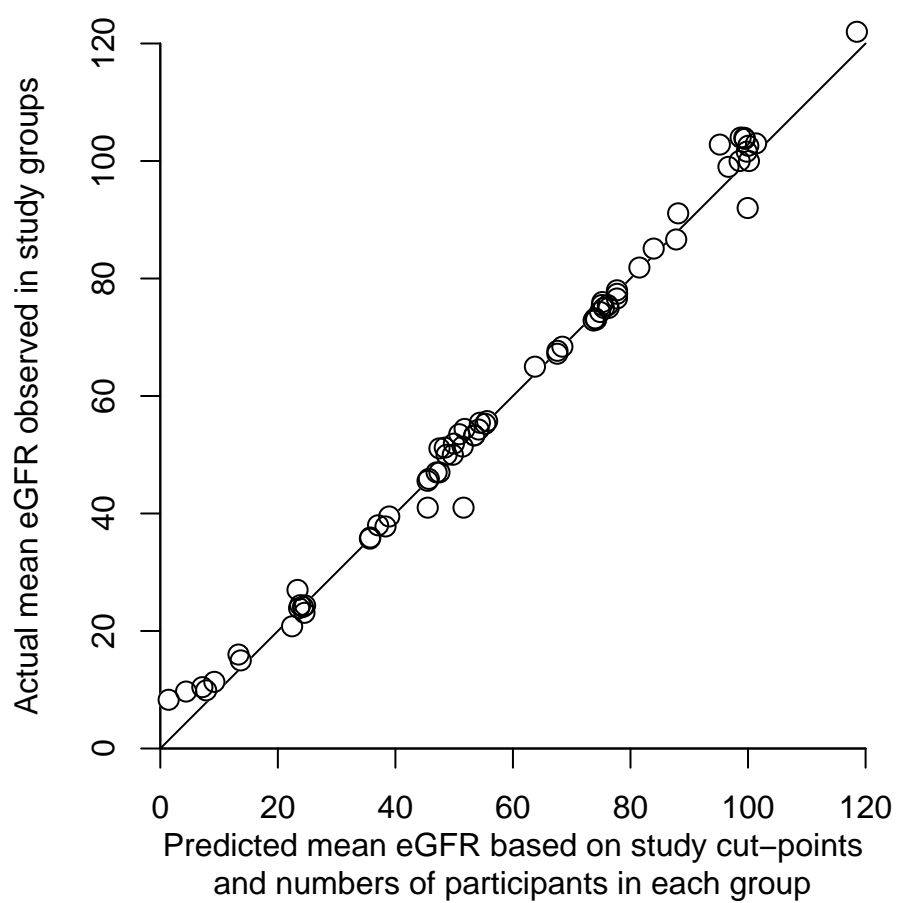

Supplement: S1 (10.1371/journal.pone.0025920.s001) [file journal.pone.0025920.s001]
