# Supplementary material for: Estimated Glomerular Filtration Rate and the Risk of Major Vascular Events and All-Cause Mortality: A Meta-Analysis
Source: PLOS journal article supplement (doi:10.1371/journal.pone.0025920), 2011-10-19
Supplement: S3 (10.1371/journal.pone.0025920.s003) [file journal.pone.0025920.s003]

**FIGURE S3: MEAN FOLLOW-UP eGFR LEVEL BY PERCENTILE OF THE BASELINE DISTRIBUTION AMONG 7697 PLACEBO PATIENTS IN THE HEART PROTECTION STUDY (FOLLOW-UP 4–5 YEARS LATER)**

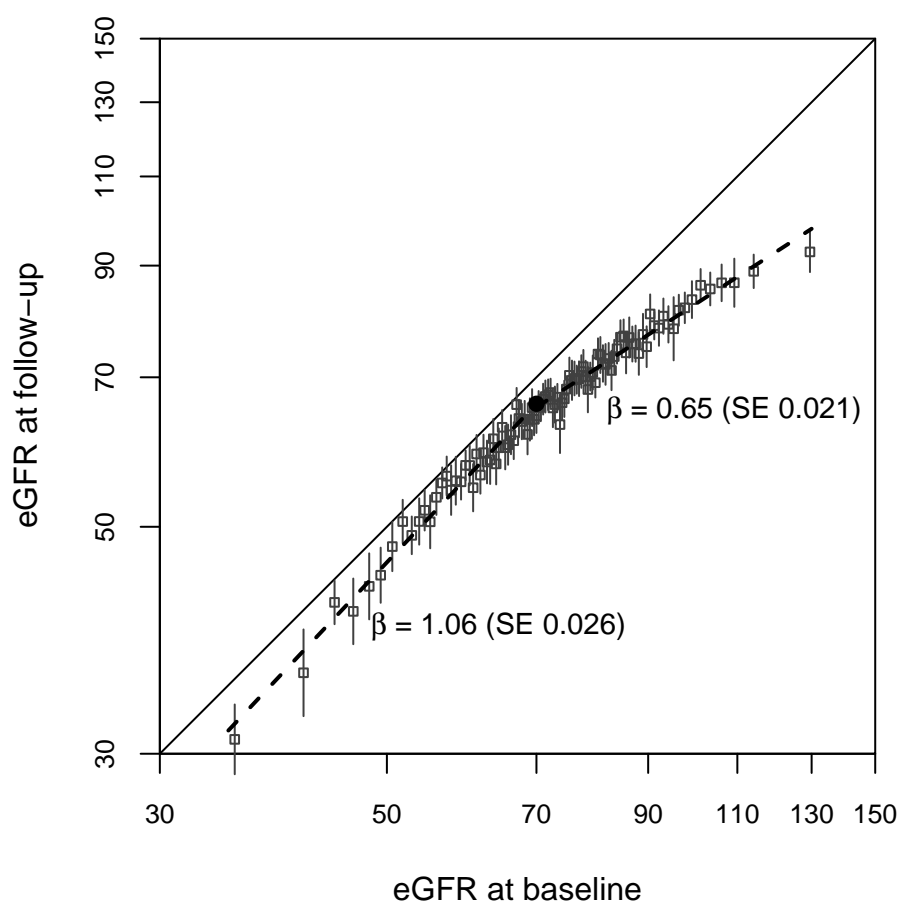

Two separate regression lines are shown, one for people whose baseline eGFR was less than 70 ml/min, and one for people whose baseline eGFR was more than 70 ml/min.
